# Supplementary material for: Transcriptome Profiling Following Neuronal and Glial Expression of ALS-Linked SOD1 in Drosophila
Source: PubMed Central journal article supplement (PMC3618356; doi:10.1534/g3.113.005850), 2013-04-01
Supplement: supp_g3.113.005850_005850SI.pdf [file supp_g3.113.005850_005850SI.pdf]

**Transcriptome Profiling following Neuronal and Glial Expression of ALS-linked SOD1 in *Drosophila***

Emily L. Kumimoto, Taylor R. Fore, and Bing Zhang\*<sup>1</sup>  
Department of Biology  
University of Oklahoma  
Norman, OK 73019

\*To whom correspondence should be sent ([zhangbing@missouri.edu](mailto:zhangbing@missouri.edu))

<sup>1</sup>Current address: Division of Biological Sciences, University of Missouri, Columbia, MO 65211-7400

**DOI: 10.1534/g3.113.005850**

**Files S1-S4**

**Available for download at <http://www.g3journal.org/lookup/suppl/doi:10.1534/g3.113.005850/-/DC1>**

**File S1** Genes with at least a 2-fold change in expression in G85R flies relative to their respective dSOD1 controls.

**File S2** Comparison of quantitative RT-PCR results vs. microarray results. Changes in expression were determined by comparing G85R expressing flies to their dSOD1 controls.

**File S3** Enriched gene ontology terms in flies expressing G85R relative to their respective dSOD1 controls.

**File S4** Enriched gene ontology terms in old G85R expressing flies from the meta-analysis.

**Table S1 Primers for real time RT-PCR**

| GENE                             |    | SEQUENCE              |
|----------------------------------|----|-----------------------|
| CG13551                          | 5' | CGCCTTAAGAACGACCAGAT  |
| CG13551                          | 3' | TCACTTGTGCAGGTTCTCG   |
| CG31742                          | 5' | CGTCGGGAAAGTTAATTGGA  |
| CG31742                          | 3' | AGCTCGATCCCAGTATGTGC  |
| CG33296                          | 5' | TGTGGTCTTGCAATCTGCTC  |
| CG33296                          | 3' | TTGGCCATAGATCCACAACA  |
| heat shock protein 22            | 5' | TGGCTATAGCTCCAGGCACT  |
| heat shock protein 22            | 3' | CGCTCCTTGAGTGTCTCCTG  |
| longitudinals lacking            | 5' | ATGCCGGAGTTGTGGTAAAG  |
| longitudinals lacking            | 3' | GTCATCGTATTCGGCTTTGG  |
| Niemann-Pick type C-1b           | 5' | ACTCACTGTCCGTCCAGCTT  |
| Niemann-Pick type C-1b           | 3' | CGGTGGTGACGTTGTACTTG  |
| Niemann-Pick type C-2e           | 5' | ATCTCCTGTACGGTGCCATC  |
| Niemann-Pick type C-2e           | 3' | GCATCGTTCAACGTGACAGT  |
| cAMP-dependent protein kinase 1  | 5' | GGATTGCGATCTTCCAAAAG  |
| cAMP-dependent protein kinase 1  | 3' | AGCAAACCTCCTTGGCACACT |
| pointed                          | 5' | ACGCCCTATGATGCTCAATC  |
| pointed                          | 3' | TATCCAGACCCAAGGTGCTC  |
| Prosap                           | 5' | CCCAAGACTATTCCCGATCA  |
| Prosap                           | 3' | GCTGTTGCACAAGTTGCTTC  |
| Protein tyrosine phosphatase 99A | 5' | ACTATGTGAGCCGCGACTTT  |
| Protein tyrosine phosphatase 99A | 3' | AGATGCTGTTGGGATTGGAC  |
| rhomboid                         | 5' | GTCCCCAGGTGTCGTACATT  |
| rhomboid                         | 3' | AACGCTAGCCACCAGATGAG  |
| Ribosomal protein L32            | 5' | CGGATCGATATGCTAAGCTGT |
| Ribosomal protein L32            | 3' | GCGCTTGTTCGATCCGTA    |

|             |    |                      |
|-------------|----|----------------------|
| Sema-1a     | 5' | CTGCTGGTCGGCTTCTTTAC |
| Sema-1a     | 3' | ACAGGACGAGGGGAAGCTAT |
| SCAP        | 5' | ACGAGAGGATTTGCGTATGG |
| SCAP        | 3' | CGCACATCCCACACAATAAG |
| sulfateless | 5' | ACGGCGATGTTATAGCCAAC |
| sulfateless | 3' | GATAGTAGGCCAGCCAGTGC |
| slamdance   | 5' | TCAAGCAGATCATGGACTCG |
| slamdance   | 3' | TCTGATCCGCAGTGTCTTG  |
| tumbleweed  | 5' | TTGGCCTCTATCGATTGTCC |
| tumbleweed  | 3' | GATATCCGTGTTGCCCAAAT |
| wrapper     | 5' | CTGAATCGGAGCTTCAGGAC |
| wrapper     | 3' | GAGCCCGAGTTGAACATCAT |

---

**Table S2 Mating scheme for cell-specific expression of SOD1**

| CELL TYPE         | STATUS       | MATING SCHEME                                  | REPLICATES | AGES    |
|-------------------|--------------|------------------------------------------------|------------|---------|
| Motoneuron        | Control      | D42-Gal4 X UAS-dSOD1 <sup>wt</sup>             | 3          | 5d, 45d |
| Motoneuron        | Experimental | D42-Gal4 X UAS-hSOD1 <sup>G85R</sup>           | 3          | 5d, 45d |
| Glia              | Control      | M1B-Gal4 X UAS-dSOD1 <sup>wt</sup>             | 3          | 5d, 45d |
| Glia              | Experimental | M1B-Gal4 X UAS-hSOD1 <sup>G85R</sup>           | 3          | 5d, 45d |
| Motoneuron + Glia | Control      | D42-Gal4, M1B-Gal4 X UAS-dSOD1 <sup>wt</sup>   | 3          | 5d, 45d |
| Motoneuron + Glia | Experimental | D42-Gal4, M1B-Gal4 X UAS-hSOD1 <sup>G85R</sup> | 3          | 5d, 45d |

Mating scheme for cell-specific expression of SOD1. The UAS-Gal4 system in was used to drive cell specific expression of SOD1. To drive expression of SOD1 in motoneurons, flies containing the D42-Gal4 driver were crossed to flies containing UAS-dSOD1<sup>wt</sup> and UAS-hSOD1<sup>G85R</sup>. To drive expression of SOD1 in glia, flies containing the M1B-Gal4 driver were crossed to flies containing UAS-dSOD1<sup>wt</sup> and UAS-hSOD1<sup>G85R</sup>. To drive expression of SOD1 in motoneurons, and glia, flies containing both the D42-Gal4, M1B-Gal4 drivers were crossed to flies containing UAS-dSOD1<sup>wt</sup> and UAS-hSOD1<sup>G85R</sup>. Three biological replicates consisting of 40 adult male flies were harvested at 5 days and 45 days post eclosion.
