# Supplementary material for: Transcriptome Profiling Following Neuronal and Glial Expression of ALS-Linked SOD1 in Drosophila
Source: PubMed Central journal article supplement (PMC3618356; doi:10.1534/g3.113.005850), 2013-04-01
Supplement: supp_g3.113.005850_TableS1.pdf [file supp_g3.113.005850_TableS1.pdf]

**Table S1 Primers for real time RT-PCR**

| GENE                             |    | SEQUENCE              |
|----------------------------------|----|-----------------------|
| CG13551                          | 5' | CGCCTTAAGAACGACCAGAT  |
| CG13551                          | 3' | TCACTTGTGCAGGTTCTCG   |
| CG31742                          | 5' | CGTCGGGAAAGTTAATTGGA  |
| CG31742                          | 3' | AGCTCGATCCCAGTATGTGC  |
| CG33296                          | 5' | TGTGGTCTTGCAATCTGCTC  |
| CG33296                          | 3' | TTGGCCATAGATCCACAACA  |
| heat shock protein 22            | 5' | TGGCTATAGCTCCAGGCACT  |
| heat shock protein 22            | 3' | CGCTCCTTGAGTGTCTCCTG  |
| longitudinals lacking            | 5' | ATGCCGGAGTTGTGGTAAAG  |
| longitudinals lacking            | 3' | GTCATCGTATTCGGCTTTGG  |
| Niemann-Pick type C-1b           | 5' | ACTCACTGTCCGTCCAGCTT  |
| Niemann-Pick type C-1b           | 3' | CGGTGGTGACGTTGTACTTG  |
| Niemann-Pick type C-2e           | 5' | ATCTCCTGTACGGTGCCATC  |
| Niemann-Pick type C-2e           | 3' | GCATCGTTCAACGTGACAGT  |
| cAMP-dependent protein kinase 1  | 5' | GGATTGCGATCTTCCAAAAG  |
| cAMP-dependent protein kinase 1  | 3' | AGCAAACCTCCTTGGCACACT |
| pointed                          | 5' | ACGCCCTATGATGCTCAATC  |
| pointed                          | 3' | TATCCAGACCCAAGGTGCTC  |
| Prosap                           | 5' | CCCAAGACTATTCCCGATCA  |
| Prosap                           | 3' | GCTGTTGCACAAGTTGCTTC  |
| Protein tyrosine phosphatase 99A | 5' | ACTATGTGAGCCGCGACTTT  |
| Protein tyrosine phosphatase 99A | 3' | AGATGCTGTTGGGATTGGAC  |
| rhomboid                         | 5' | GTCCCCAGGTGTCGTACATT  |
| rhomboid                         | 3' | AACGCTAGCCACCAGATGAG  |
| Ribosomal protein L32            | 5' | CGGATCGATATGCTAAGCTGT |
| Ribosomal protein L32            | 3' | GCGCTTGTTCGATCCGTA    |

|             |    |                      |
|-------------|----|----------------------|
| Sema-1a     | 5' | CTGCTGGTCGGCTTCTTTAC |
| Sema-1a     | 3' | ACAGGACGAGGGGAAGCTAT |
| SCAP        | 5' | ACGAGAGGATTTGCGTATGG |
| SCAP        | 3' | CGCACATCCCACACAATAAG |
| sulfateless | 5' | ACGGCGATGTTATAGCCAAC |
| sulfateless | 3' | GATAGTAGGCCAGCCAGTGC |
| slamdance   | 5' | TCAAGCAGATCATGGACTCG |
| slamdance   | 3' | TCTGATCCGCAGTGTCTTG  |
| tumbleweed  | 5' | TTGGCCTCTATCGATTGTCC |
| tumbleweed  | 3' | GATATCCGTGTTGCCAAAT  |
| wrapper     | 5' | CTGAATCGGAGCTTCAGGAC |
| wrapper     | 3' | GAGCCCGAGTTGAACATCAT |

---
