# Supplementary material for: Transcriptome Profiling Following Neuronal and Glial Expression of ALS-Linked SOD1 in Drosophila
Source: PubMed Central journal article supplement (PMC3618356; doi:10.1534/g3.113.005850), 2013-04-01
Supplement: supp_g3.113.005850_TableS2.pdf [file supp_g3.113.005850_TableS2.pdf]

**Table S2 Mating scheme for cell-specific expression of SOD1**

| CELL TYPE         | STATUS       | MATING SCHEME                                  | REPLICATES | AGES    |
|-------------------|--------------|------------------------------------------------|------------|---------|
| Motoneuron        | Control      | D42-Gal4 X UAS-dSOD1 <sup>wt</sup>             | 3          | 5d, 45d |
| Motoneuron        | Experimental | D42-Gal4 X UAS-hSOD1 <sup>G85R</sup>           | 3          | 5d, 45d |
| Glia              | Control      | M1B-Gal4 X UAS-dSOD1 <sup>wt</sup>             | 3          | 5d, 45d |
| Glia              | Experimental | M1B-Gal4 X UAS-hSOD1 <sup>G85R</sup>           | 3          | 5d, 45d |
| Motoneuron + Glia | Control      | D42-Gal4, M1B-Gal4 X UAS-dSOD1 <sup>wt</sup>   | 3          | 5d, 45d |
| Motoneuron + Glia | Experimental | D42-Gal4, M1B-Gal4 X UAS-hSOD1 <sup>G85R</sup> | 3          | 5d, 45d |

Mating scheme for cell-specific expression of SOD1. The UAS-Gal4 system in was used to drive cell specific expression of SOD1. To drive expression of SOD1 in motoneurons, flies containing the D42-Gal4 driver were crossed to flies containing UAS-dSOD1<sup>wt</sup> and UAS-hSOD1<sup>G85R</sup>. To drive expression of SOD1 in glia, flies containing the M1B-Gal4 driver were crossed to flies containing UAS-dSOD1<sup>wt</sup> and UAS-hSOD1<sup>G85R</sup>. To drive expression of SOD1 in motoneurons, and glia, flies containing both the D42-Gal4, M1B-Gal4 drivers were crossed to flies containing UAS-dSOD1<sup>wt</sup> and UAS-hSOD1<sup>G85R</sup>. Three biological replicates consisting of 40 adult male flies were harvested at 5 days and 45 days post eclosion.
